# Supplementary material for: RNA-Based Anti-Inflammatory Effects of Membrane Vesicles Derived from Lactiplantibacillus plantarum
Source: MDPI journal article supplement (doi:10.3390/foods13060967), 2024-03-21
Supplement: s1 [file s1]

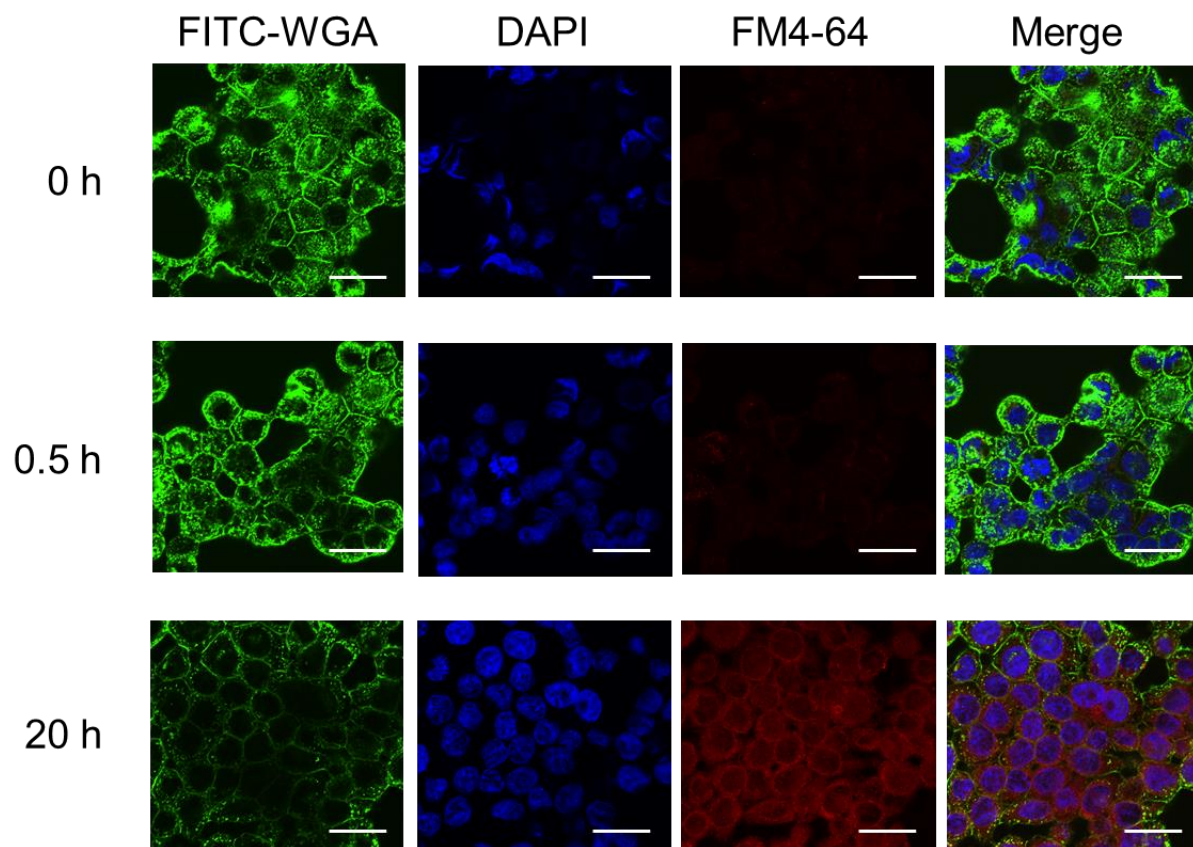

**Figure S1.** Time course of MV uptake by HT29 cells. FM4-64-labeled *Lp*MVs (10  $\mu$ g-protein/mL) were added to HT29 cells and incubated for 0.5 and 20 h. Nuclei were stained with DAPI, and cell membranes were stained with FITC-labeled wheat germ agglutinin (WGA). Scale bars indicate 100  $\mu$ m.

(a)

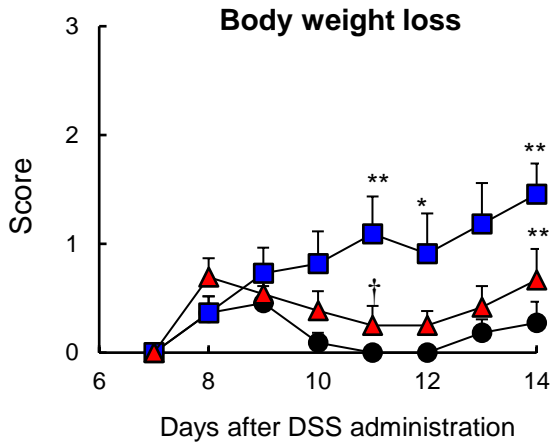

(b)

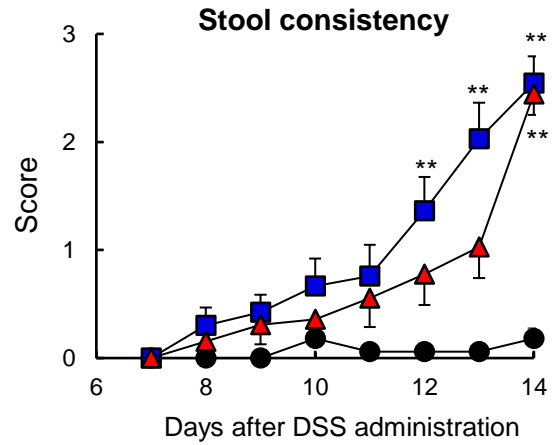

(c)

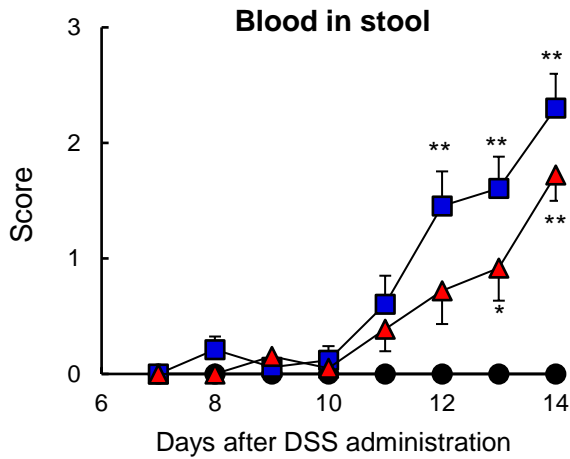

**Figure S2.** Changes in clinical parameters related to the disease activity index (DAI) after dextran sodium sulfate (DSS) administration to mice. Circles represent the control group ( $n = 11$ ), squares represent the DSS group ( $n = 11$ ), and triangles represent the DSS+MV group ( $n = 12$ ). Data are expressed as mean  $\pm$  SE. \* and \*\* denote  $p < 0.05$  and  $p < 0.01$ , respectively, vs. the control group as per Kruskal-Wallis test followed by Dunn's multiple comparison test.

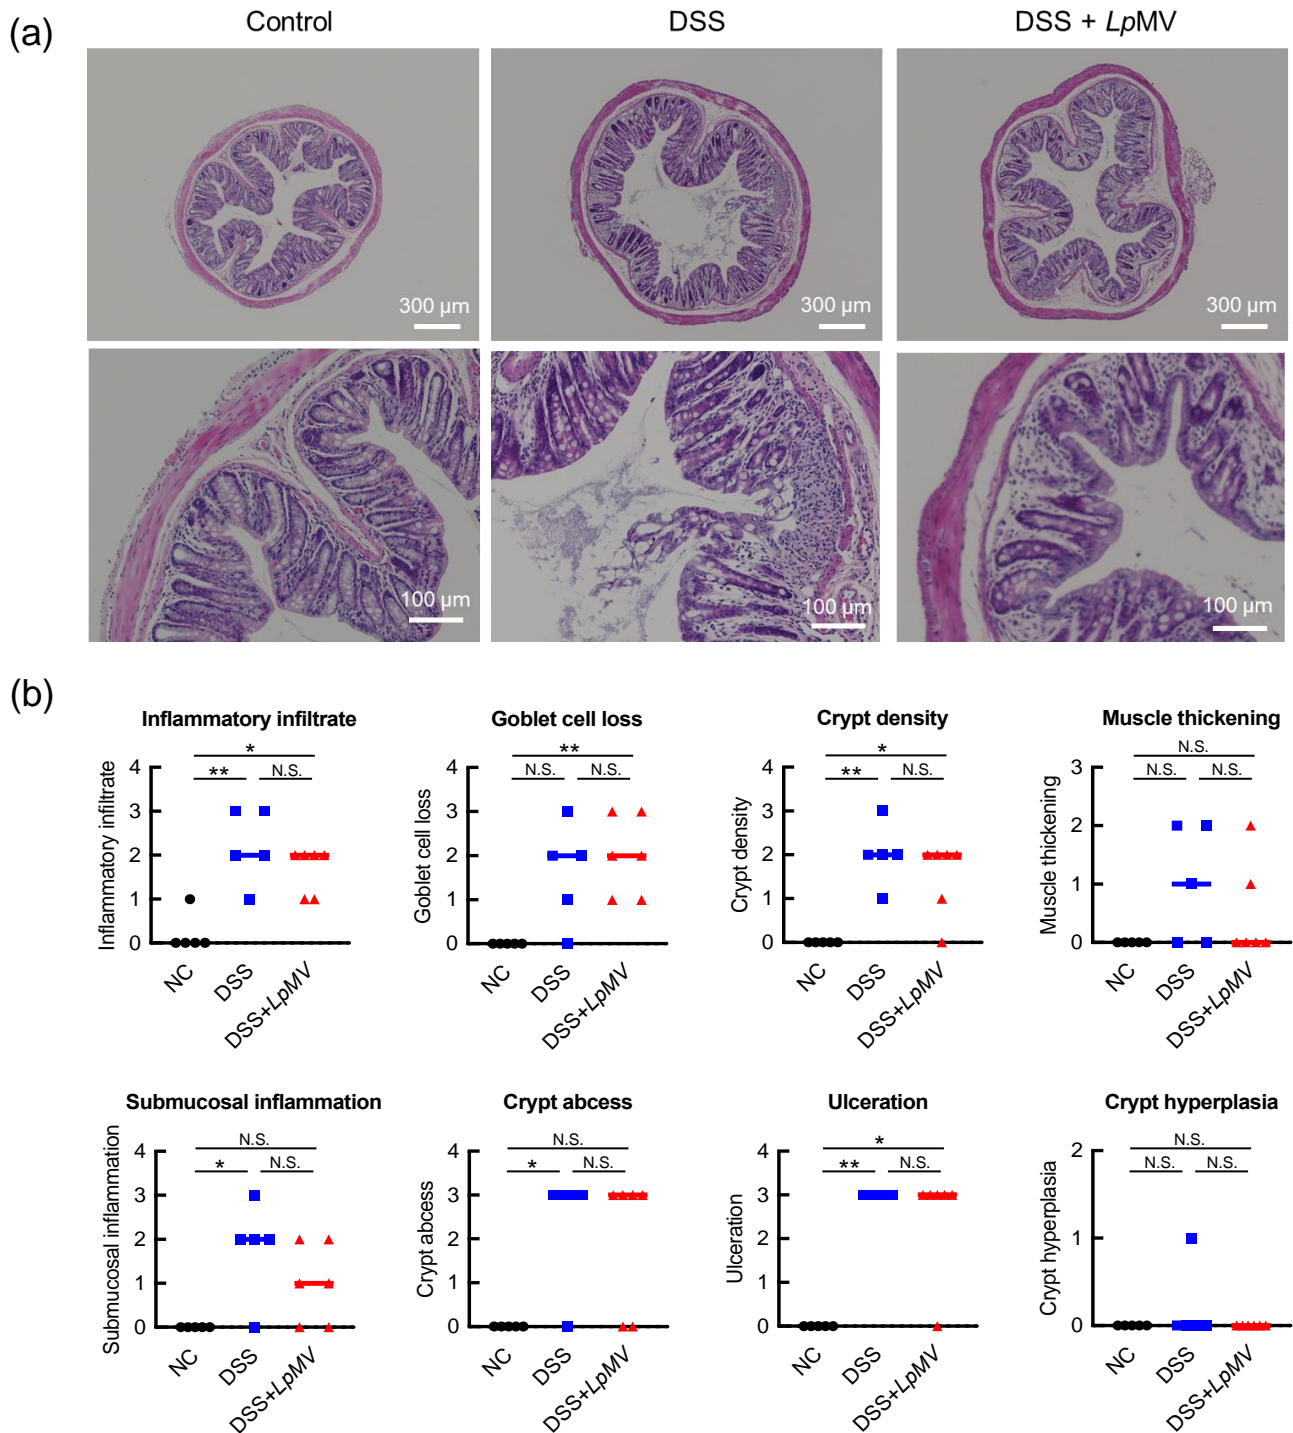

**Figure S3.** Colon sections and their histological evaluation. (a) Representative colon sections derived from mice on day 14 were stained with hematoxylin-eosin. (b) Histopathological grading scores were calculated based on the histological evaluation scoring criteria [18, 19]. \* and \*\* denote  $p < 0.05$  and  $p < 0.01$ , respectively, using Kruskal-Wallis test followed by Dunn's multiple comparison test. NC; Negative control.
