# Supplementary material for: RNA-Based Anti-Inflammatory Effects of Membrane Vesicles Derived from Lactiplantibacillus plantarum
Source: MDPI journal article supplement (doi:10.3390/foods13060967), 2024-03-21
Supplement: s1 [file s1]

**Table S1.** Bacterial strains used in this study

| Strain                                                                               | Source                                    | Culture temperature (°C) |
|--------------------------------------------------------------------------------------|-------------------------------------------|--------------------------|
| <i>Lactiplantibacillus plantarum</i> subsp. <i>plantarum</i> NBRC 15891 <sup>T</sup> | Pickled cabbage                           | 30                       |
| <i>Lactiplantibacillus plantarum</i> NCIMB 8826                                      | Human saliva                              | 37                       |
| <i>Limosilactobacillus antri</i> JCM 15950 <sup>T</sup>                              | Human stomach mucosa                      | 37                       |
| <i>Lactobacillus gasseri</i> JCM 1131 <sup>T</sup>                                   | Human intestine                           | 37                       |
| <i>Leuconostoc mesenteroides</i> subsp. <i>sake</i> NBRC 102481                      | Moto<br>(seed mash for sake fermentation) | 30                       |
| <i>Bifidobacterium longum</i> subsp. <i>infantis</i> JCM 1222 <sup>T</sup>           | Intestine of infant                       | 37                       |
| <i>Bifidobacterium longum</i> subsp. <i>longum</i> JCM 1217 <sup>T</sup>             | Intestine of adult                        | 37                       |
| <i>Bifidobacterium breve</i> JCM 1192 <sup>T</sup>                                   | Intestine of infant                       | 37                       |
